# Supplementary material for: Lamin B1 loss is a senescence-associated biomarker
Source: PubMed Central journal article supplement — Mol Biol Cell. 2012 Jun 1;23(11):2066–75. doi: 10.1091/mbc.E11-10-0884 (PMC3364172; doi:10.1091/mbc.e11-10-0884), 2012-06-01
Supplement: supp_E11-10-0884v1_CombinedSupMats.pdf [file supp_E11-10-0884v1_CombinedSupMats.pdf]

## SUPPLEMENTAL FIGURE LEGENDS

Freund\_FigS1  
Page 27

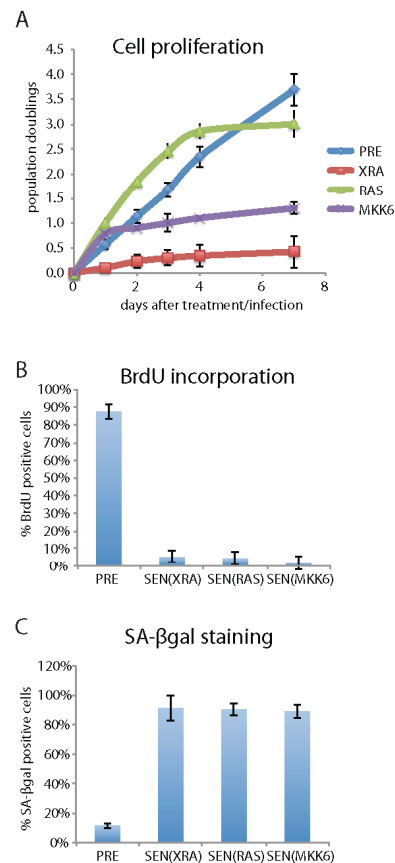

### Supplemental Figure 1

- (A) Cell proliferation. HCA2 cells (PRE) were irradiated (XRA), infected with a lentivirus expressing oncogenic RASV12 (RAS) or MKK6EE (MKK6) and counted at the indicated intervals thereafter.
- (B) BrdU incorporation. HCA2 cells were treated as in (A), allowed to senesce for 7-10 d, cultured with BrdU for 24 h, fixed, and immunostained for incorporated BrdU. BrdU-positive cells were quantified by CellProfiler
- (C) SA-Bgal staining. HCA2 cells were treated as in (A), allowed to senesce for 7-10 d, fixed, and stained for SA-Bgal.

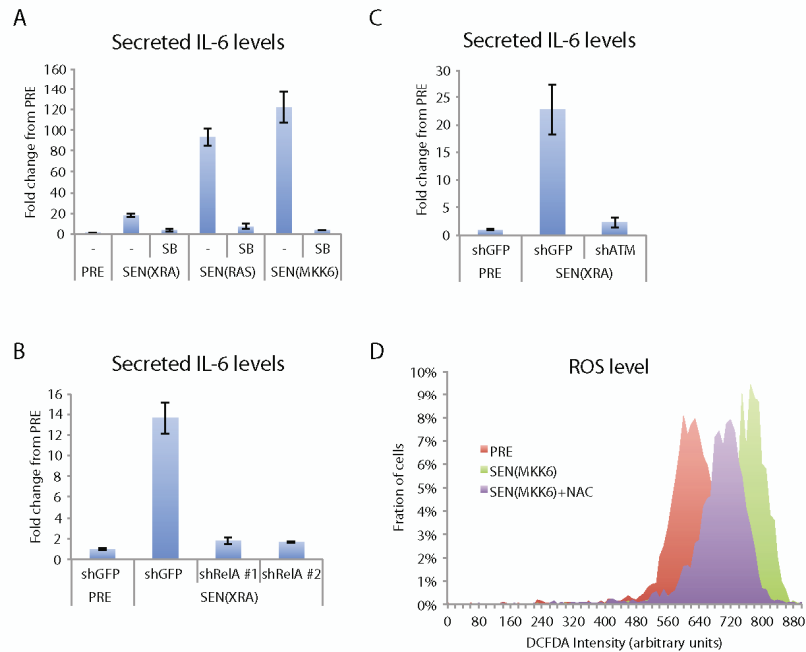

### Supplemental Figure 2

- (A) p38MAPK inhibition by SB203580 effectively reduces senescence-associated extracellular IL-6. HCA2 cells (PRE) were irradiated (XRA), infected with a lentivirus expressing oncogenic RASV12 (RAS) or MKK6EE (MKK6) and allowed to senesce. Conditioned media (CM) were then collected and analyzed by ELISA. SB: cells were cultured in 10  $\mu$ M SB203580 for 48h prior to CM collection.
- (B) RelA depletion effectively reduces senescence-associated extracellular IL-6. HCA2 cells were infected with lentiviruses expressing either of two shRNAs against RelA (shRNA #1, #2) or GFP (shGFP; control) and selected. Cells were then mock-irradiated (PRE) or irradiated and allowed to senesce (SEN(XRA)). CM were collected and analyzed by ELISA.
- (C) ATM depletion effectively reduces senescence-associated extracellular IL-6. HCA2 cells were infected with lentiviruses expressing an shRNAs

against ATM (shATM) or GFP (shGFP; control) and selected. Cells were then mock-irradiated (PRE) or irradiated and allowed to senesce (SEN(XRA)). CM were collected and analyzed by ELISA.

(D) N-acetylcysteine (NAC) effectively reduces reactive oxygen species (ROS) in senescent cells. Cells were infected with a lentivirus lacking an insert (PRE) or expressing MKK6EE (MKK6EE) and selected. 8 d after infection, cells were collected and H<sub>2</sub>O<sub>2</sub> levels were measured by flow cytometry. NAC: ROS signaling was inhibited with 10 mM NAC for 48 h before collection.

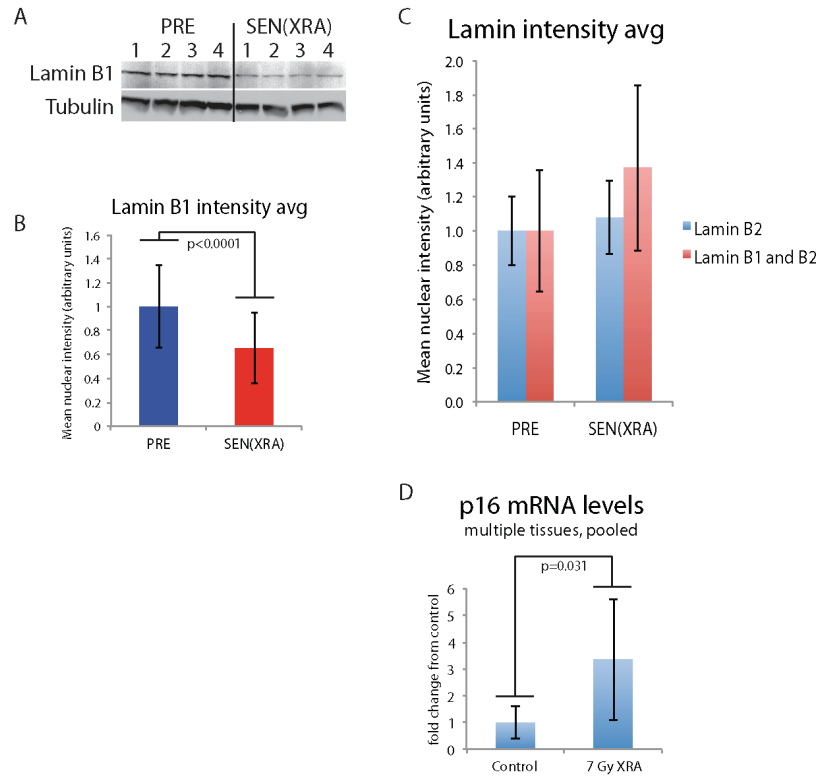

### Supplemental Figure 3

- (A) Lamin B1 declines at senescence in mouse embryonic fibroblasts (MEFs). MEFs were isolated from 4 different mice. MEFs were mock irradiated (PRE) or irradiated (10 Gy X-ray) and allowed to senesce (SEN(XRA)). Whole cell lysates were analyzed by western blotting.
- (B) Validation of lamin B1 quantitation via immunofluorescence: average lamin B1 intensity. Data from Figure 4B is presented as average intensity.  $p < 0.0001$
- (C) An antibody specifically targeting lamin B2 and an antibody that targets both lamin B1 and B2 do not show a decrease at senescence by immunofluorescence. HCA2 cells were mock irradiated (PRE) or irradiated (XRA) and allowed to senesce (SEN(XRA)). Cells were then fixed and

immunostained. Lamin B intensity was quantitated with Cell Profiler and average intensity for each condition was calculated.

p16<sup>INK4A</sup> mRNA is increased *in vivo* after irradiation. Mice were treated and mRNA was collected and analyzed as described in Figure 4F.
